# Supplementary material
Source: PubMed Central journal article supplement (PMC2638104)
Supplement: supp_M800383-JLR200_Supplemental_table_1.pdf [file supp_M800383-JLR200_Supplemental_table_1.pdf]

Supplemental Table I. Fatty acid composition of mouse chow diets.

| <b>Harlan Teklad 7002</b> |                            |
|---------------------------|----------------------------|
| <b>Fatty acid</b>         | <b>Relative amount (%)</b> |
| C14:0                     | 1.1                        |
| C16:0                     | 21.8                       |
| C16:1                     | 1.9                        |
| C18:0                     | 10.6                       |
| C18:1, n-9                | 35.5                       |
| C18:1, n-7                | 2.2                        |
| C18:2, n-6                | 24.9                       |
| C18:3, n-3                | 1.5                        |
| C20:4, n-6                | 0.3                        |

  

| <b>AIN-93G</b>    |                            |
|-------------------|----------------------------|
| <b>Fatty acid</b> | <b>Relative amount (%)</b> |
| C14:0             | 0.1                        |
| C16:0             | 10.5                       |
| C16:1             | 0.1                        |
| C18:0             | 4.4                        |
| C18:1, n-9        | 20.4                       |
| C18:1, n-7        | 1.4                        |
| C18:2, n-6        | 55.4                       |
| C18:3, n-3        | 7.7                        |
| C20:4, n-6        | ND                         |

ND, not detected.
